# Supplementary material for: Eukaryotic CD-NTase, STING, and viperin proteins evolved via domain shuffling, horizontal transfer, and ancient inheritance from prokaryotes
Source: PLoS Biol. 2023 Dec 8;21(12):e3002436. doi: 10.1371/journal.pbio.3002436 (PMC10732462; doi:10.1371/journal.pbio.3002436)
Supplement: S28 File — (HMM) [file pbio.3002436.s035.hmm]

HMMER3/f [3.2.1 | June 2018]
NAME  viperin
LENG  127
ALPH  amino
RF    no
MM    no
CONS  yes
CS    no
MAP   yes
DATE  Tue Oct 18 10:50:46 2022
NSEQ  260
EFFN  3.201599
CKSUM 1814600176
STATS LOCAL MSV       -9.6855  0.71236
STATS LOCAL VITERBI  -10.7552  0.71236
STATS LOCAL FORWARD   -3.9920  0.71236
HMM          A        C        D        E        F        G        H        I        K        L        M        N        P        Q        R        S        T        V        W        Y   
            m->m     m->i     m->d     i->m     i->i     d->m     d->d
  COMPO   2.62704  4.26324  3.03681  2.64294  3.33949  2.89579  3.73965  2.71968  2.59212  2.43959  3.59082  2.91867  3.58383  3.05906  2.95079  2.61106  2.83670  2.57887  4.44496  3.73751
          2.68618  4.42225  2.77519  2.73123  3.46354  2.40513  3.72494  3.29354  2.67741  2.69355  4.24690  2.90347  2.73739  3.18146  2.89801  2.37887  2.77519  2.98518  4.58477  3.61503
          0.04205  4.94849  3.37879  0.61958  0.77255  0.00000        *
      1   2.68222  4.66919  2.74034  1.97463  4.45710  3.48506  3.57215  3.61594  2.04528  3.37065  4.37232  2.94812  3.19497  2.57901  2.56169  2.69308  2.93231  2.87098  5.76772  4.00993      1 e - - -
          2.68618  4.42225  2.77519  2.73123  3.46354  2.40513  3.72494  3.29354  2.67741  2.69355  4.24690  2.90347  2.73739  3.18146  2.89801  2.37887  2.77519  2.98518  4.58477  3.61503
          0.01093  4.91737  5.63972  0.61958  0.77255  0.53226  0.88498
      2   3.12601  5.43700  3.49285  2.86819  4.79578  3.87029  3.35324  3.68777  1.05324  3.51632  4.49384  3.35997  4.23979  2.92839  1.87367  3.11117  3.32903  3.60633  5.80577  3.96313      2 k - - -
          2.68618  4.42225  2.77519  2.73123  3.46354  2.40513  3.72494  3.29354  2.67741  2.69355  4.24690  2.90347  2.73739  3.18146  2.89801  2.37887  2.77519  2.98518  4.58477  3.61503
          0.01085  4.92514  5.64749  0.61958  0.77255  0.52699  0.89252
      3   3.49721  3.94594  5.50589  4.94818  3.80593  4.86545  5.30293  0.95714  4.80117  1.47734  3.32552  5.02060  5.13147  4.92544  4.84832  4.22217  3.73585  1.79659  5.67113  4.38535      3 i - - -
          2.68618  4.42225  2.77519  2.73123  3.46354  2.40513  3.72494  3.29354  2.67741  2.69355  4.24690  2.90347  2.73739  3.18146  2.89801  2.37887  2.77519  2.98518  4.58477  3.61503
          0.01080  4.92958  5.65193  0.61958  0.77255  0.53472  0.88149
      4   2.73983  5.03528  3.27649  2.72159  4.27989  3.46784  3.90548  3.29251  2.60276  3.18301  4.11940  1.33530  4.08572  3.06072  2.98508  2.76277  2.43520  3.10607  5.55205  4.22350      4 n - - -
          2.68618  4.42225  2.77519  2.73123  3.46354  2.40513  3.72494  3.29354  2.67741  2.69355  4.24690  2.90347  2.73739  3.18146  2.89801  2.37887  2.77519  2.98518  4.58477  3.61503
          0.02319  4.92958  4.15455  0.61958  0.77255  0.52925  0.88927
      5   3.62276  4.61901  5.46937  4.90209  0.84217  4.84947  4.97600  2.23777  4.73039  1.64107  3.40995  4.94640  5.08362  4.75118  4.73197  4.19043  3.84416  2.68408  5.22479  3.77343      5 f - - -
          2.68618  4.42225  2.77519  2.73123  3.46354  2.40513  3.72494  3.29354  2.67741  2.69355  4.24690  2.90347  2.73739  3.18146  2.89801  2.37887  2.77519  2.98518  4.58477  3.61503
          0.01092  4.91862  5.64097  0.61958  0.77255  0.56163  0.84462
      6   1.21651  4.10636  4.23880  3.73089  4.12330  3.68171  4.55346  3.42589  3.66423  3.11820  4.09055  3.91128  4.29508  3.93099  3.94907  1.70198  2.46468  2.10722  5.57631  4.37459      6 a - - -
          2.68618  4.42225  2.77519  2.73123  3.46354  2.40513  3.72494  3.29354  2.67741  2.69355  4.24690  2.90347  2.73739  3.18146  2.89801  2.37887  2.77519  2.98518  4.58477  3.61503
          0.01359  4.91862  5.08570  0.61958  0.77255  0.50223  0.92933
      7   2.91844  4.83758  4.12343  4.00697  5.02064  0.41739  5.06074  4.58608  4.09470  3.56884  5.13405  4.06490  4.39662  4.40426  4.32483  2.85003  3.44876  3.96907  6.36559  5.14006      7 G - - -
          2.68618  4.42225  2.77519  2.73123  3.46354  2.40513  3.72494  3.29354  2.67741  2.69355  4.24690  2.90347  2.73739  3.18146  2.89801  2.37887  2.77519  2.98518  4.58477  3.61503
          0.01077  4.93209  5.65443  0.61958  0.77255  0.52170  0.90020
      8   4.39526  5.95253  5.24102  5.28722  6.21236  0.08310  6.21066  6.17505  5.57824  5.62220  6.68139  5.40993  5.34526  5.82552  5.59746  4.60981  4.93653  5.51920  6.93324  6.38179      8 G - - -
          2.68618  4.42225  2.77519  2.73123  3.46354  2.40513  3.72494  3.29354  2.67741  2.69355  4.24690  2.90347  2.73739  3.18146  2.89801  2.37887  2.77519  2.98518  4.58477  3.61503
          0.01074  4.93466  5.65700  0.61958  0.77255  0.51754  0.90630
      9   3.62792  6.24863  2.54216  0.46382  5.62697  3.39541  4.43825  5.18951  3.54150  4.65331  5.53254  3.27052  4.47061  3.61735  4.18650  3.19992  3.94958  4.71013  6.79935  5.23547      9 E - - -
          2.68618  4.42225  2.77519  2.73123  3.46354  2.40513  3.72494  3.29354  2.67741  2.69355  4.24690  2.90347  2.73739  3.18146  2.89801  2.37887  2.77519  2.98518  4.58477  3.61503
          0.01056  4.95153  5.67388  0.61958  0.77255  0.52104  0.90117
     10   2.83214  3.89169  4.74681  4.48189  5.00772  3.57320  5.23505  4.02269  4.32705  4.12164  4.98577  4.25174  0.43892  4.61231  4.48691  2.91086  3.17208  3.76519  6.41755  5.26427     10 P - - -
          2.68618  4.42225  2.77519  2.73123  3.46354  2.40513  3.72494  3.29354  2.67741  2.69355  4.24690  2.90347  2.73739  3.18146  2.89801  2.37887  2.77519  2.98518  4.58477  3.61503
          0.01056  4.95153  5.67388  0.61958  0.77255  0.52104  0.90117
     11   2.88032  4.30918  4.69658  4.09328  1.57817  4.05943  4.38392  2.55611  3.62554  1.72251  2.94095  4.16233  4.42216  4.07793  3.98514  3.20422  2.21257  2.41918  4.92876  3.75009     11 f - - -
          2.68618  4.42225  2.77519  2.73123  3.46354  2.40513  3.72494  3.29354  2.67741  2.69355  4.24690  2.90347  2.73739  3.18146  2.89801  2.37887  2.77519  2.98518  4.58477  3.61503
          0.03682  4.95153  3.53780  0.61958  0.77255  0.52104  0.90117
     12   3.35095  4.76462  5.36973  4.76917  3.24203  4.68403  5.01187  2.13117  4.58977  0.81296  2.32059  4.83286  4.94334  4.64173  4.59260  4.01561  3.40551  2.20826  5.35093  4.07663     12 l - - -
          2.68618  4.42225  2.77519  2.73123  3.46354  2.40513  3.72494  3.29354  2.67741  2.69355  4.24690  2.90347  2.73739  3.18146  2.89801  2.37887  2.77519  2.98518  4.58477  3.61503
          0.20495  4.92555  1.72568  0.61958  0.77255  0.56695  0.83760
     13   2.49132  4.14965  3.44560  2.79354  2.97641  3.69948  2.74364  2.98548  2.65593  2.58082  3.75348  3.10628  3.34713  2.89157  2.69723  2.84764  2.98816  2.77339  4.76624  2.71450     13 a - - -
          2.68618  4.42225  2.77519  2.73123  3.46354  2.40513  3.72494  3.29354  2.67741  2.69355  4.24690  2.90347  2.73739  3.18146  2.89801  2.37887  2.77519  2.98518  4.58477  3.61503
          0.07988  4.73905  2.68786  0.61958  0.77255  0.48011  0.96422
     14   2.55008  4.05290  2.56970  2.33228  4.62972  3.23256  2.99361  4.04317  2.19260  3.45966  4.01889  2.73966  2.33377  2.66812  2.92733  2.68523  2.99018  3.62436  5.73353  3.90265     14 k - - -
          2.68618  4.42225  2.77519  2.73123  3.46354  2.40513  3.72494  3.29354  2.67741  2.69355  4.24690  2.90347  2.73739  3.18146  2.89801  2.37887  2.77519  2.98518  4.58477  3.61503
          0.17249  4.82938  1.89420  0.61958  0.77255  0.65895  0.72855
     15   2.67646  5.24509  2.36528  2.33832  4.41892  2.97397  3.18646  3.95996  2.04848  3.26728  4.29485  2.92245  2.97900  2.59374  2.64574  2.68585  2.95332  3.64042  4.91550  3.60978     15 k - - -
          2.68618  4.42225  2.77519  2.73123  3.46354  2.40513  3.72494  3.29354  2.67741  2.69355  4.24690  2.90347  2.73739  3.18146  2.89801  2.37887  2.77519  2.98518  4.58477  3.61503
          0.28336  4.70984  1.43655  0.61958  0.77255  0.79465  0.60100
     16   2.56231  4.68176  2.78137  2.38257  3.47219  3.46668  3.37367  3.53098  2.38958  2.67878  3.84828  2.91041  3.42133  2.59452  2.62845  2.67659  2.82922  3.23109  4.01819  3.42489     16 e - - -
          2.68618  4.42225  2.77519  2.73123  3.46354  2.40513  3.72494  3.29354  2.67741  2.69355  4.24690  2.90347  2.73739  3.18146  2.89801  2.37887  2.77519  2.98518  4.58477  3.61503
          0.01644  4.51178  5.23413  0.61958  0.77255  0.25844  1.47953
     17   2.96084  4.07310  4.92281  4.31701  3.01854  4.18737  4.52796  2.02601  4.11964  1.06689  3.10838  3.94325  4.53780  4.25544  4.14707  3.50176  3.07489  2.00642  5.01720  3.84672     17 l - - -
          2.68618  4.42225  2.77519  2.73123  3.46354  2.40513  3.72494  3.29354  2.67741  2.69355  4.24690  2.90347  2.73739  3.18146  2.89801  2.37887  2.77519  2.98518  4.58477  3.61503
          0.01472  4.93920  4.89974  0.61958  0.77255  0.55233  0.85710
     18   2.55099  4.86585  2.94643  2.45850  3.64866  1.83969  3.73807  3.59089  2.41408  2.96074  4.07771  2.87154  3.50119  2.96700  3.11886  2.65091  2.85907  3.03443  5.61896  3.92817     18 g - - -
          2.68618  4.42225  2.77519  2.73123  3.46354  2.40513  3.72494  3.29354  2.67741  2.69355  4.24690  2.90347  2.73739  3.18146  2.89801  2.37887  2.77519  2.98518  4.58477  3.61503
          0.01074  4.93522  5.65756  0.61958  0.77255  0.55497  0.85353
     19   2.58802  5.36072  2.27327  1.65855  4.54012  3.42423  3.46900  4.19155  2.32325  3.66593  4.17688  2.95169  3.47373  2.43512  2.79785  2.62461  2.93900  3.66372  5.79345  4.38251     19 e - - -
          2.68618  4.42225  2.77519  2.73123  3.46354  2.40513  3.72494  3.29354  2.67741  2.69355  4.24690  2.90347  2.73739  3.18146  2.89801  2.37887  2.77519  2.98518  4.58477  3.61503
          0.01343  4.93689  5.08888  0.61958  0.77255  0.48170  0.96164
     20   2.70862  4.30439  4.83732  4.22831  3.11321  4.09340  4.42213  2.13961  3.77491  1.15214  2.38021  4.23909  4.45020  4.16018  4.04973  3.40495  3.15914  2.35074  4.58714  3.35820     20 l - - -
          2.68618  4.42225  2.77519  2.73123  3.46354  2.40513  3.72494  3.29354  2.67741  2.69355  4.24690  2.90347  2.73739  3.18146  2.89801  2.37887  2.77519  2.98518  4.58477  3.61503
          0.01356  4.95252  5.05124  0.61958  0.77255  0.50699  0.92207
     21   2.57555  2.71230  5.10233  4.51293  3.54660  4.37774  4.75656  1.69240  4.32722  1.74369  3.31758  4.53200  4.71876  4.47710  4.36258  3.70378  3.25963  1.37579  5.23753  4.05677     21 v - - -
          2.68618  4.42225  2.77519  2.73123  3.46354  2.40513  3.72494  3.29354  2.67741  2.69355  4.24690  2.90347  2.73739  3.18146  2.89801  2.37887  2.77519  2.98518  4.58477  3.61503
          0.03448  4.95219  3.61834  0.61958  0.77255  0.50234  0.92916
     22   2.34102  4.96951  2.95684  2.31876  4.66948  3.55592  3.44080  3.74280  1.89890  3.43190  4.29658  2.89686  4.01920  2.53487  2.06872  2.60009  2.99879  3.39068  5.22081  4.19126     22 k - - -
          2.68618  4.42225  2.77519  2.73123  3.46354  2.40513  3.72494  3.29354  2.67741  2.69355  4.24690  2.90347  2.73739  3.18146  2.89801  2.37887  2.77519  2.98518  4.58477  3.61503
          0.01240  4.93252  5.27476  0.61958  0.77255  0.48769  0.95203
     23   2.52943  4.19073  3.59076  2.50652  2.52221  3.72415  3.07817  3.08240  2.83009  2.61868  3.36515  3.17652  4.18724  3.08206  2.99633  2.98506  3.00009  2.90444  5.26549  2.11826     23 y - - -
          2.68618  4.42225  2.77519  2.73123  3.46354  2.40513  3.72494  3.29354  2.67741  2.69355  4.24690  2.90347  2.73739  3.18146  2.89801  2.37887  2.77519  2.98518  4.58477  3.61503
          0.01409  4.95044  4.97412  0.61958  0.77255  0.48680  0.95345
     24   1.41257  2.05894  3.97734  3.41846  3.73619  3.62726  3.77794  3.00197  3.35397  2.70453  3.71771  3.74453  4.27623  3.63512  3.66044  2.30304  2.97423  2.75766  5.19529  3.98469     24 a - - -
          2.68618  4.42225  2.77519  2.73123  3.46354  2.40513  3.72494  3.29354  2.67741  2.69355  4.24690  2.90347  2.73739  3.18146  2.89801  2.37887  2.77519  2.98518  4.58477  3.61503
          0.02382  4.95561  4.10466  0.61958  0.77255  0.50366  0.92713
     25   2.86513  5.32840  3.04239  2.40815  4.65796  3.64391  3.41313  4.05142  1.28464  3.62466  4.37406  3.07337  4.03616  2.91667  2.41780  2.60956  2.84092  3.58285  5.24175  3.63809     25 k - - -
          2.68618  4.42225  2.77519  2.73123  3.46354  2.40513  3.72494  3.29354  2.67741  2.69355  4.24690  2.90347  2.73739  3.18146  2.89801  2.37887  2.77519  2.98518  4.58477  3.61503
          0.06675  4.94400  2.85687  0.61958  0.77255  0.49138  0.94618
     26   2.65891  4.77992  2.69981  1.82883  4.68285  3.03181  3.50333  3.94263  2.27197  3.51959  4.17896  2.89632  4.00354  2.46083  2.60702  2.30736  2.86709  3.53899  5.77440  4.03885     26 e - - -
          2.68618  4.42225  2.77519  2.73123  3.46354  2.40513  3.72494  3.29354  2.67741  2.69355  4.24690  2.90347  2.73739  3.18146  2.89801  2.37887  2.77519  2.98518  4.58477  3.61503
          0.02481  4.90066  4.07063  0.61958  0.77255  0.48626  0.95431
     27   2.61273  5.18735  2.69572  1.99431  4.26253  3.58641  3.48959  3.38523  2.33074  2.20043  3.92123  3.09648  4.04298  2.76308  2.93500  2.69926  2.86704  3.04805  5.66086  3.52399     27 e - - -
          2.68624  4.42178  2.77530  2.73134  3.46362  2.40524  3.72505  3.29357  2.67749  2.69241  4.24693  2.90358  2.73743  3.18157  2.89812  2.37896  2.77530  2.98524  4.58487  3.61514
          0.45449  1.21380  2.68581  0.09988  2.35334  0.49766  0.93637
     28   2.73775  5.11338  3.00486  2.45421  4.03937  1.48985  3.29076  3.94504  2.39881  3.39954  4.18362  2.91890  3.95051  2.77260  2.75775  2.74685  3.04426  3.61424  5.67597  4.30904     29 g - - -
          2.68618  4.42225  2.77519  2.73123  3.46354  2.40513  3.72494  3.29354  2.67741  2.69355  4.24690  2.90347  2.73739  3.18146  2.89801  2.37887  2.77519  2.98518  4.58477  3.61503
          0.04935  4.88216  3.20474  0.61958  0.77255  0.68128  0.70516
     29   2.80851  4.09367  3.99633  3.92065  2.16810  3.98184  4.30599  2.37097  3.69233  1.43748  2.74115  4.08607  4.34727  3.65023  3.78486  3.16855  2.92984  2.28945  4.63607  3.41047     30 l - - -
          2.68618  4.42225  2.77519  2.73123  3.46354  2.40513  3.72494  3.29354  2.67741  2.69355  4.24690  2.90347  2.73739  3.18146  2.89801  2.37887  2.77519  2.98518  4.58477  3.61503
          0.02003  4.84458  4.42589  0.61958  0.77255  0.48386  0.95816
     30   2.41007  5.09172  2.83961  2.07113  4.51044  3.49647  3.80662  3.69667  2.09422  3.55949  4.36901  2.91953  2.99487  2.76903  2.58100  2.54880  2.58143  2.96092  5.76467  4.14980     31 e - - -
          2.68627  4.42181  2.77528  2.73132  3.46362  2.40521  3.72503  3.29351  2.67749  2.69363  4.24685  2.90353  2.73748  3.18155  2.89809  2.37828  2.77524  2.98516  4.58486  3.61498
          0.30301  1.43122  3.79910  0.12136  2.16905  0.48997  0.94842
     31   2.73845  3.81568  4.63487  4.03477  3.17363  3.91509  4.35829  2.54797  3.86597  2.17615  3.27322  3.98679  3.89431  4.03822  3.95132  3.33486  1.85325  1.34086  4.92219  3.74022     33 v - - -
          2.68618  4.42225  2.77519  2.73123  3.46354  2.40513  3.72494  3.29354  2.67741  2.69355  4.24690  2.90347  2.73739  3.18146  2.89801  2.37887  2.77519  2.98518  4.58477  3.61503
          0.01084  4.92577  5.64811  0.61958  0.77255  0.55820  0.84918
     32   2.60260  4.03771  3.75537  3.19036  3.45966  3.34265  4.03633  3.10896  3.14490  2.82169  3.14086  3.58971  3.91180  3.37047  3.49845  1.21060  2.77283  2.63960  5.19065  3.95663     34 s - - -
          2.68618  4.42225  2.77519  2.73123  3.46354  2.40513  3.72494  3.29354  2.67741  2.69355  4.24690  2.90347  2.73739  3.18146  2.89801  2.37887  2.77519  2.98518  4.58477  3.61503
          0.02609  4.93211  3.98788  0.61958  0.77255  0.43663  1.03905
     33   2.62784  4.34356  4.87314  4.26803  3.36119  4.15252  4.49216  1.27566  4.07351  1.96580  2.81463  4.29200  4.50832  4.21809  3.80302  3.46492  3.10476  1.81604  4.99677  3.57547     35 i - - -
          2.68618  4.42225  2.77519  2.73123  3.46354  2.40513  3.72494  3.29354  2.67741  2.69355  4.24690  2.90347  2.73739  3.18146  2.89801  2.37887  2.77519  2.98518  4.58477  3.61503
          0.01414  4.95015  4.96842  0.61958  0.77255  0.52462  0.89595
     34   2.75952  4.42266  4.83207  4.24862  3.58116  4.22067  4.59795  1.36909  4.08528  2.58508  3.56593  4.33168  4.11234  4.26628  4.17460  3.35587  3.00104  1.20299  5.15151  3.67427     36 v - - -
          2.68618  4.42225  2.77519  2.73123  3.46354  2.40513  3.72494  3.29354  2.67741  2.69355  4.24690  2.90347  2.73739  3.18146  2.89801  2.37887  2.77519  2.98518  4.58477  3.61503
          0.01061  4.94663  5.66897  0.61958  0.77255  0.53365  0.88301
     35   2.86922  4.86628  3.50240  2.96277  4.17868  3.71856  4.07265  3.56902  2.93339  3.06949  3.63335  3.36553  3.68817  3.13830  3.35162  1.59824  1.40161  3.26920  5.52253  4.23825     37 t - - -
          2.68618  4.42225  2.77519  2.73123  3.46354  2.40513  3.72494  3.29354  2.67741  2.69355  4.24690  2.90347  2.73739  3.18146  2.89801  2.37887  2.77519  2.98518  4.58477  3.61503
          0.01061  4.94663  5.66897  0.61958  0.77255  0.53365  0.88301
     36   3.51811  5.93217  2.57046  2.73591  5.13872  3.80024  3.85812  4.88111  3.36269  4.38098  5.24053  0.54304  4.43403  3.55855  3.89494  3.42449  3.82621  4.45544  6.34807  4.88190     38 N - - -
          2.68618  4.42225  2.77519  2.73123  3.46354  2.40513  3.72494  3.29354  2.67741  2.69355  4.24690  2.90347  2.73739  3.18146  2.89801  2.37887  2.77519  2.98518  4.58477  3.61503
          0.01061  4.94663  5.66897  0.61958  0.77255  0.51844  0.90498
     37   2.09908  4.98548  3.56710  3.31155  4.97331  0.73016  4.58257  4.42084  3.41836  4.03785  4.84694  3.56361  3.82425  3.31082  3.90410  2.71085  3.37729  3.89528  6.25109  4.97129     39 g - - -
          2.68618  4.42225  2.77519  2.73123  3.46354  2.40513  3.72494  3.29354  2.67741  2.69355  4.24690  2.90347  2.73739  3.18146  2.89801  2.37887  2.77519  2.98518  4.58477  3.61503
          0.06363  4.95015  2.90839  0.61958  0.77255  0.52462  0.89595
     38   2.75814  4.21576  3.45962  2.86658  3.67024  3.67095  3.48771  3.32491  2.87442  2.89972  3.86211  3.37084  4.13265  3.03569  3.05063  1.27681  2.64443  3.02399  4.99362  3.43016     40 s - - -
          2.68618  4.42225  2.77519  2.73123  3.46354  2.40513  3.72494  3.29354  2.67741  2.69355  4.24690  2.90347  2.73739  3.18146  2.89801  2.37887  2.77519  2.98518  4.58477  3.61503
          0.01115  4.89767  5.62002  0.61958  0.77255  0.44729  1.01987
     39   2.81047  4.36107  3.85054  3.28182  3.04298  3.72045  3.94435  2.79700  2.39265  1.53704  3.38852  3.27803  4.25015  3.47955  2.58114  3.12933  2.74520  2.78418  5.11036  3.18147     41 l - - -
          2.68618  4.42225  2.77519  2.73123  3.46354  2.40513  3.72494  3.29354  2.67741  2.69355  4.24690  2.90347  2.73739  3.18146  2.89801  2.37887  2.77519  2.98518  4.58477  3.61503
          0.01593  4.95015  4.74197  0.61958  0.77255  0.52462  0.89595
     40   2.89919  3.81172  4.79413  3.74814  3.19385  3.77129  4.39880  1.67649  3.98701  1.35923  3.15904  4.20490  4.26221  4.13239  4.02143  3.31262  3.04219  2.02967  4.91252  3.73482     42 l - - -
          2.68618  4.42225  2.77519  2.73123  3.46354  2.40513  3.72494  3.29354  2.67741  2.69355  4.24690  2.90347  2.73739  3.18146  2.89801  2.37887  2.77519  2.98518  4.58477  3.61503
          0.14777  4.94218  2.03844  0.61958  0.77255  0.51538  0.90949
     41   2.79116  5.26305  2.81130  2.38736  4.47746  3.40974  3.52591  3.36931  2.22804  3.39502  4.30915  2.52119  3.94097  2.71827  2.72767  2.47117  1.90647  3.34105  5.70816  4.16471     43 t - - -
          2.68618  4.42225  2.77519  2.73123  3.46354  2.40513  3.72494  3.29354  2.67741  2.69355  4.24690  2.90347  2.73739  3.18146  2.89801  2.37887  2.77519  2.98518  4.58477  3.61503
          0.02273  4.81271  4.24424  0.61958  0.77255  0.54044  0.87346
     42   2.67655  5.33996  2.54045  1.67399  4.68499  3.25403  3.57664  4.08563  2.26702  3.64518  4.38073  2.77132  3.13751  2.73145  2.42900  2.64395  2.94843  3.73060  5.77255  4.17483     44 e - - -
          2.68618  4.42225  2.77519  2.73123  3.46354  2.40513  3.72494  3.29354  2.67741  2.69355  4.24690  2.90347  2.73739  3.18146  2.89801  2.37887  2.77519  2.98518  4.58477  3.61503
          0.07452  4.87991  2.74559  0.61958  0.77255  0.61865  0.77365
     43   2.33143  5.30807  2.51065  1.86891  4.65538  3.20556  3.77000  3.98748  2.19077  3.30849  4.35446  2.89838  3.61931  2.67808  2.60983  2.45343  2.86891  3.70451  5.73724  4.21731     45 e - - -
          2.68618  4.42225  2.77519  2.73123  3.46354  2.40513  3.72494  3.29354  2.67741  2.69355  4.24690  2.90347  2.73739  3.18146  2.89801  2.37887  2.77519  2.98518  4.58477  3.61503
          0.01655  4.83393  4.77275  0.61958  0.77255  0.60946  0.78448
     44   2.81422  4.36399  4.01629  3.50656  2.84192  3.84754  4.07611  2.77968  3.13081  2.30249  3.13538  3.59242  4.28942  3.71871  3.13763  2.89122  2.87297  2.38985  1.72748  3.14333     46 w - - -
          2.68618  4.42225  2.77519  2.73123  3.46354  2.40513  3.72494  3.29354  2.67741  2.69355  4.24690  2.90347  2.73739  3.18146  2.89801  2.37887  2.77519  2.98518  4.58477  3.61503
          0.01143  4.87299  5.59533  0.61958  0.77255  0.62319  0.76837
     45   2.54496  3.71349  4.79511  4.18242  2.16922  4.03258  4.16903  2.18222  3.97532  1.51368  2.31813  4.18365  4.39518  4.11196  3.99551  3.22380  3.06411  2.37544  4.86605  3.63109     47 l - - -
          2.68618  4.42225  2.77519  2.73123  3.46354  2.40513  3.72494  3.29354  2.67741  2.69355  4.24690  2.90347  2.73739  3.18146  2.89801  2.37887  2.77519  2.98518  4.58477  3.61503
          0.01122  4.89105  5.61339  0.61958  0.77255  0.65673  0.73094
     46   2.46982  4.98084  2.49217  1.95651  4.67714  3.39992  3.48789  3.99337  2.10776  3.25808  4.37601  2.92622  3.77197  2.35024  2.53404  2.66977  3.00143  3.49094  5.75754  4.11573     48 e - - -
          2.68618  4.42225  2.77519  2.73123  3.46354  2.40513  3.72494  3.29354  2.67741  2.69355  4.24690  2.90347  2.73739  3.18146  2.89801  2.37887  2.77519  2.98518  4.58477  3.61503
          0.01545  4.89105  4.85159  0.61958  0.77255  0.65673  0.73094
     47   2.71281  5.19839  2.74898  2.06463  4.34526  3.60174  3.76073  4.05135  1.92587  3.25992  4.29870  2.81629  3.68011  2.52481  2.31541  2.40045  2.80639  3.58919  5.74396  4.35365     49 k - - -
          2.68618  4.42225  2.77519  2.73123  3.46354  2.40513  3.72494  3.29354  2.67741  2.69355  4.24690  2.90347  2.73739  3.18146  2.89801  2.37887  2.77519  2.98518  4.58477  3.61503
          0.01507  4.88687  4.90440  0.61958  0.77255  0.66558  0.72150
     48   2.77629  4.27738  4.31109  3.91658  2.61711  3.98195  2.89183  2.33681  3.68186  1.93842  2.80681  3.37304  4.20232  3.94835  3.59308  3.21843  3.03404  2.42464  4.16356  2.04794     50 l - - -
          2.68618  4.42225  2.77519  2.73123  3.46354  2.40513  3.72494  3.29354  2.67741  2.69355  4.24690  2.90347  2.73739  3.18146  2.89801  2.37887  2.77519  2.98518  4.58477  3.61503
          0.07952  4.88311  2.67561  0.61958  0.77255  0.58643  0.81263
     49   2.11308  5.20810  2.93929  2.48441  4.31649  2.02138  3.59405  3.71350  2.21045  3.37374  4.26099  3.03817  3.99834  2.80835  2.88699  2.42197  3.04445  3.18242  5.66886  4.01497     51 g - - -
          2.68618  4.42225  2.77519  2.73123  3.46354  2.40513  3.72494  3.29354  2.67741  2.69355  4.24690  2.90347  2.73739  3.18146  2.89801  2.37887  2.77519  2.98518  4.58477  3.61503
          0.11936  4.83927  2.25761  0.61958  0.77255  0.64716  0.74136
     50   2.51880  4.97976  2.60703  2.12359  4.63155  3.01677  3.57928  4.06101  2.09794  3.55365  4.33030  2.81444  2.67714  2.59922  2.59390  2.61558  2.90758  3.67969  5.42802  4.14892     52 k - - -
          2.68618  4.42225  2.77519  2.73123  3.46354  2.40513  3.72494  3.29354  2.67741  2.69355  4.24690  2.90347  2.73739  3.18146  2.89801  2.37887  2.77519  2.98518  4.58477  3.61503
          0.02000  4.76619  4.48374  0.61958  0.77255  0.47453  0.97333
     51   2.60494  3.95119  3.19735  2.77246  2.75024  3.69187  3.01906  3.24064  2.71293  2.46968  3.70702  2.93599  4.14891  3.15242  3.10255  2.82054  2.96896  2.85198  4.31272  2.18433     53 y - - -
          2.68618  4.42225  2.77519  2.73123  3.46354  2.40513  3.72494  3.29354  2.67741  2.69355  4.24690  2.90347  2.73739  3.18146  2.89801  2.37887  2.77519  2.98518  4.58477  3.61503
          0.01125  4.88901  5.61135  0.61958  0.77255  0.57364  0.82890
     52   3.69653  4.95344  5.67258  5.10232  3.01867  5.04183  5.40713  1.69835  4.95187  0.90763  3.22713  5.20089  5.22789  4.96379  4.94769  4.40579  3.92031  1.63627  5.62978  4.57636     54 l - - -
          2.68618  4.42225  2.77519  2.73123  3.46354  2.40513  3.72494  3.29354  2.67741  2.69355  4.24690  2.90347  2.73739  3.18146  2.89801  2.37887  2.77519  2.98518  4.58477  3.61503
          0.01100  4.91103  5.63338  0.61958  0.77255  0.61275  0.78058
     53   2.82746  5.43428  1.22745  2.50193  4.76432  3.64225  3.81436  4.24783  2.54007  3.73309  4.48483  2.75893  4.06987  2.84210  2.96015  2.41928  2.83217  3.74929  5.87224  4.45619     55 d - - -
          2.68618  4.42225  2.77519  2.73123  3.46354  2.40513  3.72494  3.29354  2.67741  2.69355  4.24690  2.90347  2.73739  3.18146  2.89801  2.37887  2.77519  2.98518  4.58477  3.61503
          0.01430  4.91103  4.98638  0.61958  0.77255  0.61275  0.78058
     54   2.86130  4.05923  4.63190  4.02899  3.10457  3.89165  3.68454  1.74831  3.74111  2.36690  2.38513  4.10466  4.37385  3.25814  3.39343  3.09507  3.09343  2.27241  2.57280  2.94027     56 i - - -
          2.68618  4.42225  2.77519  2.73123  3.46354  2.40513  3.72494  3.29354  2.67741  2.69355  4.24690  2.90347  2.73739  3.18146  2.89801  2.37887  2.77519  2.98518  4.58477  3.61503
          0.01104  4.90777  5.63012  0.61958  0.77255  0.62011  0.77194
     55   2.83473  3.99327  4.81983  4.20993  2.86737  4.07796  4.41119  1.85615  3.58002  1.32590  3.01389  4.22280  4.43703  4.14752  3.73999  3.38861  3.13907  1.95954  4.91350  3.73929     57 l - - -
          2.68618  4.42225  2.77519  2.73123  3.46354  2.40513  3.72494  3.29354  2.67741  2.69355  4.24690  2.90347  2.73739  3.18146  2.89801  2.37887  2.77519  2.98518  4.58477  3.61503
          0.01104  4.90777  5.63012  0.61958  0.77255  0.62011  0.77194
     56   1.89110  4.99306  3.30197  2.75616  4.27583  1.62410  3.93586  3.62855  2.75075  3.30392  4.12394  3.05606  4.08909  2.87807  3.17868  2.55313  2.74487  3.26251  5.55906  3.81032     58 g - - -
          2.68618  4.42225  2.77519  2.73123  3.46354  2.40513  3.72494  3.29354  2.67741  2.69355  4.24690  2.90347  2.73739  3.18146  2.89801  2.37887  2.77519  2.98518  4.58477  3.61503
          0.01104  4.90777  5.63012  0.61958  0.77255  0.62011  0.77194
     57   3.53629  4.80887  5.54099  4.97731  2.68382  4.89248  5.29556  1.21193  4.82577  1.58634  3.55109  5.04928  5.13891  4.91435  4.85381  4.24894  3.77055  1.38556  5.61874  4.30278     59 i - - -
          2.68618  4.42225  2.77519  2.73123  3.46354  2.40513  3.72494  3.29354  2.67741  2.69355  4.24690  2.90347  2.73739  3.18146  2.89801  2.37887  2.77519  2.98518  4.58477  3.61503
          0.01104  4.90777  5.63012  0.61958  0.77255  0.60656  0.78795
     58   2.80291  4.73115  4.23543  3.87173  4.37036  3.55061  4.85301  4.22768  3.85432  3.93546  4.77459  3.96651  3.54358  4.14047  4.15350  0.49226  3.05473  3.33563  6.19597  4.98179     60 S - - -
          2.68618  4.42225  2.77519  2.73123  3.46354  2.40513  3.72494  3.29354  2.67741  2.69355  4.24690  2.90347  2.73739  3.18146  2.89801  2.37887  2.77519  2.98518  4.58477  3.61503
          0.01100  4.91103  5.63338  0.61958  0.77255  0.61275  0.78058
     59   2.86381  2.13735  4.80840  4.19841  2.88341  3.61755  4.39406  1.72799  3.99530  2.25135  3.31084  4.07357  4.42124  4.13665  4.02137  3.25155  3.12035  1.66295  4.90027  3.64756     61 v - - -
          2.68618  4.42225  2.77519  2.73123  3.46354  2.40513  3.72494  3.29354  2.67741  2.69355  4.24690  2.90347  2.73739  3.18146  2.89801  2.37887  2.77519  2.98518  4.58477  3.61503
          0.01230  4.91103  5.32716  0.61958  0.77255  0.60558  0.78913
     60   3.59948  6.24899  0.50671  2.58321  5.46594  3.77380  3.94079  5.06064  3.43303  3.90509  5.40568  3.07144  4.42914  3.26933  4.05621  3.45167  3.89827  4.61815  6.65923  5.10073     62 D - - -
          2.68618  4.42225  2.77519  2.73123  3.46354  2.40513  3.72494  3.29354  2.67741  2.69355  4.24690  2.90347  2.73739  3.18146  2.89801  2.37887  2.77519  2.98518  4.58477  3.61503
          0.01100  4.91147  5.63381  0.61958  0.77255  0.60640  0.78814
     61   1.94259  4.72460  4.27691  3.91437  4.27679  2.64517  4.91017  4.41644  3.92314  4.08921  4.88939  3.97886  4.28503  4.18390  4.22960  0.63351  3.15436  3.81007  6.31606  5.12523     63 S - - -
          2.68618  4.42225  2.77519  2.73123  3.46354  2.40513  3.72494  3.29354  2.67741  2.69355  4.24690  2.90347  2.73739  3.18146  2.89801  2.37887  2.77519  2.98518  4.58477  3.61503
          0.04452  4.91275  3.31892  0.61958  0.77255  0.60884  0.78522
     62   2.17308  3.82050  4.07883  3.65966  1.80610  3.39980  4.23567  2.58986  3.55001  2.11179  3.45569  3.89242  3.92037  3.49053  3.75150  2.45858  2.79804  2.50145  4.95090  3.75602     64 f - - -
          2.68618  4.42225  2.77519  2.73123  3.46354  2.40513  3.72494  3.29354  2.67741  2.69355  4.24690  2.90347  2.73739  3.18146  2.89801  2.37887  2.77519  2.98518  4.58477  3.61503
          0.01136  4.87958  5.60193  0.61958  0.77255  0.63466  0.75527
     63   2.78497  4.35319  1.93209  2.41927  4.40910  3.61422  3.33809  3.62597  2.46145  3.27601  4.33357  2.17291  4.00714  2.75397  2.89571  2.41835  2.83264  3.38203  5.73335  4.01608     65 d - - -
          2.68618  4.42225  2.77519  2.73123  3.46354  2.40513  3.72494  3.29354  2.67741  2.69355  4.24690  2.90347  2.73739  3.18146  2.89801  2.37887  2.77519  2.98518  4.58477  3.61503
          0.01124  4.88937  5.61171  0.61958  0.77255  0.65657  0.73111
     64   2.50438  5.00133  2.29773  1.66986  4.44517  3.53919  3.57049  3.99424  2.45984  3.40450  4.36288  3.00932  2.96944  2.75982  2.79633  2.59412  2.95313  3.35172  5.74779  4.27297     66 e - - -
          2.68618  4.42225  2.77519  2.73123  3.46354  2.40513  3.72494  3.29354  2.67741  2.69355  4.24690  2.90347  2.73739  3.18146  2.89801  2.37887  2.77519  2.98518  4.58477  3.61503
          0.01124  4.88937  5.61171  0.61958  0.77255  0.60766  0.78663
     65   2.35654  4.98596  2.61039  1.75023  4.68717  3.18610  3.53764  4.09057  2.32492  3.53088  4.38524  2.74213  4.00586  2.55188  2.96149  2.32183  2.82391  3.58313  5.77790  4.22518     67 e - - -
          2.68618  4.42225  2.77519  2.73123  3.46354  2.40513  3.72494  3.29354  2.67741  2.69355  4.24690  2.90347  2.73739  3.18146  2.89801  2.37887  2.77519  2.98518  4.58477  3.61503
          0.01441  4.90676  4.97451  0.61958  0.77255  0.63023  0.76029
     66   2.69840  4.44437  3.84711  3.41840  3.56489  3.79657  4.17590  2.35431  3.31246  2.45467  3.55689  3.58482  4.27098  3.46386  3.56762  2.73940  1.48821  2.00044  5.04618  3.83572     68 t - - -
          2.68618  4.42225  2.77519  2.73123  3.46354  2.40513  3.72494  3.29354  2.67741  2.69355  4.24690  2.90347  2.73739  3.18146  2.89801  2.37887  2.77519  2.98518  4.58477  3.61503
          0.01109  4.90344  5.62579  0.61958  0.77255  0.62382  0.76764
     67   2.70895  4.55084  3.02001  2.50336  4.56219  3.39525  2.69146  4.02124  2.57506  2.94865  4.30745  1.49453  4.02513  2.67425  2.89280  2.77240  3.03124  3.62561  5.71220  4.32655     69 n - - -
          2.68618  4.42225  2.77519  2.73123  3.46354  2.40513  3.72494  3.29354  2.67741  2.69355  4.24690  2.90347  2.73739  3.18146  2.89801  2.37887  2.77519  2.98518  4.58477  3.61503
          0.01105  4.90676  5.62911  0.61958  0.77255  0.55039  0.85973
     68   2.37332  5.25296  2.63195  2.34857  3.85492  3.63786  3.65818  3.26334  2.15310  2.98591  4.05213  2.95877  4.03025  2.56759  2.44291  2.77345  2.74529  2.86560  5.71116  3.99467     70 k - - -
          2.68618  4.42225  2.77519  2.73123  3.46354  2.40513  3.72494  3.29354  2.67741  2.69355  4.24690  2.90347  2.73739  3.18146  2.89801  2.37887  2.77519  2.98518  4.58477  3.61503
          0.01083  4.92648  5.64882  0.61958  0.77255  0.58497  0.81446
     69   2.39780  5.14242  2.91348  2.15385  4.65339  3.53500  3.52132  3.99027  1.94648  2.75660  3.90633  2.86375  4.01561  2.51514  2.57770  2.60158  2.77732  3.59429  4.48580  4.35988     71 k - - -
          2.68618  4.42225  2.77519  2.73123  3.46354  2.40513  3.72494  3.29354  2.67741  2.69355  4.24690  2.90347  2.73739  3.18146  2.89801  2.37887  2.77519  2.98518  4.58477  3.61503
          0.01416  4.92042  4.99577  0.61958  0.77255  0.58497  0.81446
     70   2.86734  4.27688  4.44138  3.93390  2.91227  3.90032  3.78703  1.25131  3.52087  1.89616  3.10574  4.10411  4.37845  4.01982  3.93086  3.13348  2.95678  2.34346  4.89578  3.71443     72 i - - -
          2.68618  4.42225  2.77519  2.73123  3.46354  2.40513  3.72494  3.29354  2.67741  2.69355  4.24690  2.90347  2.73739  3.18146  2.89801  2.37887  2.77519  2.98518  4.58477  3.61503
          0.01963  4.91719  4.41319  0.61958  0.77255  0.59254  0.80502
     71   3.46522  5.84869  2.58270  2.74996  5.35820  0.59481  4.40468  4.86949  3.17035  4.38840  5.25834  3.19970  4.42210  3.16063  3.92046  3.39661  3.80050  4.42055  6.55245  5.09178     73 G - - -
          2.68618  4.42225  2.77519  2.73123  3.46354  2.40513  3.72494  3.29354  2.67741  2.69355  4.24690  2.90347  2.73739  3.18146  2.89801  2.37887  2.77519  2.98518  4.58477  3.61503
          0.02033  4.90860  4.36311  0.61958  0.77255  0.56297  0.84284
     72   2.87944  5.13265  3.11527  2.55801  4.12171  3.61787  3.87680  3.49569  2.59481  3.39674  3.94089  3.16005  4.07962  2.93583  1.12965  2.79694  3.10802  3.33555  5.61359  4.27346     74 r - - -
          2.68612  4.42175  2.77528  2.73132  3.46362  2.40496  3.72490  3.29347  2.67747  2.69355  4.24683  2.90352  2.73743  3.18150  2.89805  2.37895  2.77519  2.98502  4.58485  3.61505
          0.53818  1.46197  1.69059  0.12465  2.14393  0.58795  0.81072
     73   2.52169  4.62776  2.88763  2.49052  4.02189  2.16774  3.64495  3.64962  2.38772  3.28460  4.12207  2.84499  3.72984  2.79761  2.40496  2.51946  2.90998  3.03357  5.58979  3.85728     76 g - - -
          2.68618  4.42225  2.77519  2.73123  3.46354  2.40513  3.72494  3.29354  2.67741  2.69355  4.24690  2.90347  2.73739  3.18146  2.89801  2.37887  2.77519  2.98518  4.58477  3.61503
          0.27223  4.71724  1.47237  0.61958  0.77255  0.89993  0.52188
     74   2.57743  5.17860  2.89988  2.32408  4.42504  2.78435  3.30741  3.99187  2.00552  3.47906  4.22217  2.64281  3.74771  2.43993  2.53437  2.46041  2.77744  3.56394  5.37269  4.21308     77 k - - -
          2.68618  4.42225  2.77519  2.73123  3.46354  2.40513  3.72494  3.29354  2.67741  2.69355  4.24690  2.90347  2.73739  3.18146  2.89801  2.37887  2.77519  2.98518  4.58477  3.61503
          0.03454  4.47943  3.78941  0.61958  0.77255  0.95928  0.48316
     75   2.50269  5.17606  2.68687  2.41261  4.49295  1.90270  3.62362  3.95998  2.36653  3.41292  4.22755  2.56471  3.85120  2.71310  2.84075  2.59654  2.79525  3.48313  5.62721  4.23215     78 g - - -
          2.68618  4.42225  2.77519  2.73123  3.46354  2.40513  3.72494  3.29354  2.67741  2.69355  4.24690  2.90347  2.73739  3.18146  2.89801  2.37887  2.77519  2.98518  4.58477  3.61503
          0.04729  4.55696  3.33266  0.61958  0.77255  0.52730  0.89207
     76   2.55468  5.29665  2.89359  2.15722  4.64008  3.31974  2.90289  3.93446  1.90117  3.57590  4.33780  2.49890  3.95796  2.56278  2.48501  2.64324  2.90351  3.56309  5.73017  4.11582     79 k - - -
          2.68618  4.42238  2.77527  2.73134  3.46364  2.40507  3.72499  3.29367  2.67736  2.69355  4.24703  2.90347  2.73729  3.18136  2.89800  2.37893  2.77518  2.98515  4.58466  3.61473
          1.20404  0.91418  1.20673  0.08766  2.47782  0.69791  0.68841
     77   2.64374  4.65981  2.69948  2.34486  3.56333  3.40375  3.55939  3.39640  2.36661  2.51140  3.47121  2.76071  3.37869  2.74083  2.86578  2.53171  2.73939  3.15337  5.43473  4.08859     81 e - - -
          2.68618  4.42225  2.77519  2.73123  3.46354  2.40513  3.72494  3.29354  2.67741  2.69355  4.24690  2.90347  2.73739  3.18146  2.89801  2.37887  2.77519  2.98518  4.58477  3.61503
          0.01873  4.49315  4.90973  0.61958  0.77255  1.01122  0.45221
     78   2.65389  4.83870  2.77948  2.40725  4.19821  3.22828  2.17585  3.88091  2.40709  3.16816  4.17183  2.73219  3.79795  2.54231  2.90893  2.44561  2.67476  3.42008  5.57838  3.89213     82 h - - -
          2.68618  4.42225  2.77519  2.73123  3.46354  2.40513  3.72494  3.29354  2.67741  2.69355  4.24690  2.90347  2.73739  3.18146  2.89801  2.37887  2.77519  2.98518  4.58477  3.61503
          0.01571  4.55733  5.27967  0.61958  0.77255  0.69533  0.69097
     79   2.49389  4.16368  4.09656  3.36763  3.20243  3.72608  4.18140  2.25783  3.44206  1.70516  3.30933  3.69093  3.83176  3.74830  3.45106  2.96383  2.76004  1.82456  4.86883  3.50314     83 l - - -
          2.68618  4.42225  2.77519  2.73123  3.46354  2.40513  3.72494  3.29354  2.67741  2.69355  4.24690  2.90347  2.73739  3.18146  2.89801  2.37887  2.77519  2.98518  4.58477  3.61503
          0.01326  4.72531  5.44766  0.61958  0.77255  0.80609  0.59167
     80   2.43712  5.14399  2.54932  1.83219  4.63196  3.33111  3.49133  3.89459  2.28307  3.56640  4.14474  2.71626  3.76972  2.54687  2.76585  2.46680  2.79732  3.49549  5.72388  4.11526     84 e - - -
          2.68618  4.42225  2.77519  2.73123  3.46354  2.40513  3.72494  3.29354  2.67741  2.69355  4.24690  2.90347  2.73739  3.18146  2.89801  2.37887  2.77519  2.98518  4.58477  3.61503
          0.02264  4.76695  4.27747  0.61958  0.77255  0.87901  0.53647
     81   2.70907  4.46162  2.70551  2.28673  4.47117  3.41744  2.91829  3.45781  2.05604  3.50893  4.11978  2.70942  3.95221  2.33118  2.53120  2.56257  2.84569  3.47218  5.70941  4.04929     85 k - - -
          2.68618  4.42225  2.77519  2.73123  3.46354  2.40513  3.72494  3.29354  2.67741  2.69355  4.24690  2.90347  2.73739  3.18146  2.89801  2.37887  2.77519  2.98518  4.58477  3.61503
          0.02819  4.75716  3.95264  0.61958  0.77255  0.62585  0.76530
     82   2.54751  4.05499  4.70010  4.09067  3.19989  3.98346  4.12825  2.27114  3.89459  1.69832  3.01229  4.11672  4.34800  3.92811  3.93367  2.80808  2.79224  1.74849  4.25073  2.67402     86 l - - -
          2.68618  4.42225  2.77519  2.73123  3.46354  2.40513  3.72494  3.29354  2.67741  2.69355  4.24690  2.90347  2.73739  3.18146  2.89801  2.37887  2.77519  2.98518  4.58477  3.61503
          0.01819  4.82516  4.60474  0.61958  0.77255  0.76665  0.62468
     83   2.72903  4.62139  3.24698  2.35216  3.20006  3.34161  3.63898  3.12833  2.24493  2.28640  3.81642  3.21817  4.05784  2.63998  2.60669  2.73801  2.88390  2.91345  5.21897  3.43365     87 k - - -
          2.68618  4.42225  2.77519  2.73123  3.46354  2.40513  3.72494  3.29354  2.67741  2.69355  4.24690  2.90347  2.73739  3.18146  2.89801  2.37887  2.77519  2.98518  4.58477  3.61503
          0.02029  4.82368  4.41867  0.61958  0.77255  0.75636  0.63370
     84   2.66781  5.31540  2.76519  2.05162  4.65971  3.39013  3.55292  4.03663  2.02371  3.42948  4.35635  2.74871  3.97448  2.42605  2.07950  2.66106  2.87358  3.65479  5.74833  4.15271     88 k - - -
          2.68618  4.42225  2.77519  2.73123  3.46354  2.40513  3.72494  3.29354  2.67741  2.69355  4.24690  2.90347  2.73739  3.18146  2.89801  2.37887  2.77519  2.98518  4.58477  3.61503
          0.02623  4.82361  4.02586  0.61958  0.77255  0.78704  0.60732
     85   2.28484  3.80182  4.62398  4.01895  3.04552  3.96847  4.14474  1.97418  3.57141  1.86165  3.05600  3.89234  4.33373  3.99776  3.52428  3.17160  2.82791  1.71409  4.83683  3.65695     89 v - - -
          2.68618  4.42225  2.77519  2.73123  3.46354  2.40513  3.72494  3.29354  2.67741  2.69355  4.24690  2.90347  2.73739  3.18146  2.89801  2.37887  2.77519  2.98518  4.58477  3.61503
          0.08112  4.80957  2.66257  0.61958  0.77255  0.75968  0.63077
     86   2.08969  3.91043  4.04972  3.51730  2.88342  3.86354  3.66649  2.25366  2.93845  2.14006  3.42488  3.78308  4.23407  3.42969  2.72116  2.81854  2.98605  2.23548  4.26330  3.44724     90 a - - -
          2.68618  4.42225  2.77519  2.73123  3.46354  2.40513  3.72494  3.29354  2.67741  2.69355  4.24690  2.90347  2.73739  3.18146  2.89801  2.37887  2.77519  2.98518  4.58477  3.61503
          0.05473  4.75630  3.10859  0.61958  0.77255  0.33986  1.24435
     87   2.40333  5.35097  2.25965  2.06166  4.69633  3.22995  3.35970  4.18254  2.24874  3.58232  4.39158  2.77354  3.82906  2.47379  2.52798  2.48049  2.96160  3.55799  5.78343  4.30324     91 e - - -
          2.68618  4.42225  2.77519  2.73123  3.46354  2.40513  3.72494  3.29354  2.67741  2.69355  4.24690  2.90347  2.73739  3.18146  2.89801  2.37887  2.77519  2.98518  4.58477  3.61503
          0.01516  4.90993  4.86977  0.61958  0.77255  0.56926  0.83459
     88   2.53081  4.79382  3.18700  2.68214  3.74508  3.75042  3.97581  3.14288  2.43662  2.20567  3.32676  3.01402  4.05312  3.20041  2.75696  2.74024  2.87129  2.91972  2.42576  3.66614     92 l - - -
          2.68618  4.42225  2.77519  2.73123  3.46354  2.40513  3.72494  3.29354  2.67741  2.69355  4.24690  2.90347  2.73739  3.18146  2.89801  2.37887  2.77519  2.98518  4.58477  3.61503
          0.02145  4.91710  4.27544  0.61958  0.77255  0.55525  0.85315
     89   2.28347  1.70045  4.72671  4.00652  3.06582  3.85479  4.35803  2.24722  3.92775  1.91988  3.21924  4.15550  4.39386  4.07958  3.97459  3.08626  3.07009  2.25587  4.88503  3.58760     93 c - - -
          2.68618  4.42225  2.77519  2.73123  3.46354  2.40513  3.72494  3.29354  2.67741  2.69355  4.24690  2.90347  2.73739  3.18146  2.89801  2.37887  2.77519  2.98518  4.58477  3.61503
          0.01861  4.91736  4.49868  0.61958  0.77255  0.55569  0.85255
     90   2.66720  5.35021  2.81131  2.29864  4.69363  3.51429  2.94485  4.09940  1.99871  3.16500  4.32409  2.95596  4.01212  2.41487  1.96974  2.59366  2.97268  3.73999  5.78361  4.23626     94 r - - -
          2.68618  4.42225  2.77519  2.73123  3.46354  2.40513  3.72494  3.29354  2.67741  2.69355  4.24690  2.90347  2.73739  3.18146  2.89801  2.37887  2.77519  2.98518  4.58477  3.61503
          0.01090  4.92013  5.64248  0.61958  0.77255  0.59197  0.80573
     91   2.51459  4.80037  2.40107  1.93063  4.69689  3.56695  3.41816  4.18238  1.97930  3.57469  4.30319  3.04691  3.97642  2.39716  2.73490  2.43974  2.81768  3.74274  5.78544  4.25037     95 e - - -
          2.68618  4.42225  2.77519  2.73123  3.46354  2.40513  3.72494  3.29354  2.67741  2.69355  4.24690  2.90347  2.73739  3.18146  2.89801  2.37887  2.77519  2.98518  4.58477  3.61503
          0.01090  4.92013  5.64248  0.61958  0.77255  0.55844  0.84886
     92   2.36116  4.19277  3.94429  3.03527  2.77676  3.72999  3.03106  2.55353  3.25435  2.07412  3.41226  3.15873  4.26821  3.30356  3.31745  2.95289  3.04589  2.67854  5.07222  2.21222     96 l - - -
          2.68618  4.42225  2.77519  2.73123  3.46354  2.40513  3.72494  3.29354  2.67741  2.69355  4.24690  2.90347  2.73739  3.18146  2.89801  2.37887  2.77519  2.98518  4.58477  3.61503
          0.01758  4.92816  4.58708  0.61958  0.77255  0.57293  0.82982
     93   2.74859  5.03675  2.42106  2.44377  4.70097  1.81921  3.78201  4.18364  2.33092  3.66491  4.34355  2.10792  4.02565  2.80580  2.94263  2.63082  3.09550  3.74985  5.79847  4.38907     97 g - - -
          2.68618  4.42225  2.77519  2.73123  3.46354  2.40513  3.72494  3.29354  2.67741  2.69355  4.24690  2.90347  2.73739  3.18146  2.89801  2.37887  2.77519  2.98518  4.58477  3.61503
          0.01898  4.92147  4.46439  0.61958  0.77255  0.58884  0.80962
     94   2.79881  4.26018  4.74222  4.13369  3.22493  3.87070  4.21428  1.45110  3.68507  2.18018  2.84862  4.16335  4.24276  4.08853  3.98098  3.33981  2.92853  1.61887  4.88380  3.36527     98 i - - -
          2.68618  4.42225  2.77519  2.73123  3.46354  2.40513  3.72494  3.29354  2.67741  2.69355  4.24690  2.90347  2.73739  3.18146  2.89801  2.37887  2.77519  2.98518  4.58477  3.61503
          0.35224  4.91346  1.23947  0.61958  0.77255  0.59686  0.79970
     95   2.41130  4.89696  2.89462  2.38789  4.43841  3.11836  3.64876  3.46884  1.97524  3.09457  4.02471  2.87965  3.70924  2.65472  2.36881  2.54119  2.85008  3.31023  5.58985  3.95496     99 k - - -
          2.68618  4.42225  2.77519  2.73123  3.46354  2.40513  3.72494  3.29354  2.67741  2.69355  4.24690  2.90347  2.73739  3.18146  2.89801  2.37887  2.77519  2.98518  4.58477  3.61503
          0.01535  4.58016  5.30251  0.61958  0.77255  0.53946  0.87482
     96   2.78735  4.21654  4.66202  4.05535  1.82108  3.97898  4.12459  2.12852  3.86726  1.79733  3.20071  4.09959  3.82642  4.02169  3.91959  2.99559  2.77830  2.02658  4.83775  3.65892    100 l - - -
          2.68618  4.42225  2.77519  2.73123  3.46354  2.40513  3.72494  3.29354  2.67741  2.69355  4.24690  2.90347  2.73739  3.18146  2.89801  2.37887  2.77519  2.98518  4.58477  3.61503
          0.01222  4.80649  5.52883  0.61958  0.77255  0.45541  1.00564
     97   3.01950  5.43861  2.98017  2.68531  4.78496  3.53362  3.90861  4.23687  0.91910  3.72179  4.49581  3.21565  4.14511  2.73375  2.90376  2.77145  3.24345  3.83484  5.84796  3.92748    101 k - - -
          2.68618  4.42225  2.77519  2.73123  3.46354  2.40513  3.72494  3.29354  2.67741  2.69355  4.24690  2.90347  2.73739  3.18146  2.89801  2.37887  2.77519  2.98518  4.58477  3.61503
          0.01525  4.91540  4.85338  0.61958  0.77255  0.57151  0.83166
     98   3.57359  4.85133  5.56040  4.98554  3.35140  4.90767  5.29266  1.22443  4.82896  1.19702  2.77851  5.06513  5.13940  4.88834  4.84296  4.26043  3.48956  1.87890  5.59189  4.49752    102 l - - -
          2.68618  4.42225  2.77519  2.73123  3.46354  2.40513  3.72494  3.29354  2.67741  2.69355  4.24690  2.90347  2.73739  3.18146  2.89801  2.37887  2.77519  2.98518  4.58477  3.61503
          0.01092  4.91874  5.64109  0.61958  0.77255  0.59522  0.80172
     99   2.88205  5.29767  3.17975  2.75669  4.57466  3.74778  3.99843  3.91757  2.72677  3.59883  4.41334  0.93233  4.18974  2.82115  3.01631  2.94178  3.27975  3.68604  5.77672  3.86410    103 n - - -
          2.68618  4.42225  2.77519  2.73123  3.46354  2.40513  3.72494  3.29354  2.67741  2.69355  4.24690  2.90347  2.73739  3.18146  2.89801  2.37887  2.77519  2.98518  4.58477  3.61503
          0.01092  4.91874  5.64109  0.61958  0.77255  0.52434  0.89636
    100   2.79263  4.68576  3.77940  3.23545  3.72188  3.75327  4.21659  3.25581  3.18322  3.06138  3.94306  3.61642  4.23228  3.50453  3.27510  2.16969  1.03045  2.83846  5.41385  4.17065    104 t - - -
          2.68618  4.42225  2.77519  2.73123  3.46354  2.40513  3.72494  3.29354  2.67741  2.69355  4.24690  2.90347  2.73739  3.18146  2.89801  2.37887  2.77519  2.98518  4.58477  3.61503
          0.01519  4.93598  4.84176  0.61958  0.77255  0.55387  0.85501
    101   3.14595  4.63842  4.88363  3.80636  3.90032  4.48628  4.92932  2.20768  4.21542  2.58343  3.80513  4.53045  4.84435  4.46744  4.39724  3.81876  2.50855  0.70530  5.56771  4.36441    105 v - - -
          2.68618  4.42225  2.77519  2.73123  3.46354  2.40513  3.72494  3.29354  2.67741  2.69355  4.24690  2.90347  2.73739  3.18146  2.89801  2.37887  2.77519  2.98518  4.58477  3.61503
          0.02659  4.93156  3.96218  0.61958  0.77255  0.56469  0.84057
    102   3.09224  4.65578  5.30565  4.75005  3.54463  4.69882  5.13116  1.67206  4.60597  2.48576  3.74322  4.82971  5.00574  4.78330  4.68820  4.04556  3.60109  0.73884  5.58940  3.71587    106 v - - -
          2.68618  4.42225  2.77519  2.73123  3.46354  2.40513  3.72494  3.29354  2.67741  2.69355  4.24690  2.90347  2.73739  3.18146  2.89801  2.37887  2.77519  2.98518  4.58477  3.61503
          0.01095  4.91592  5.63827  0.61958  0.77255  0.60176  0.79374
    103   2.84840  3.07896  3.33642  2.69769  4.04438  3.62332  3.70825  3.52488  2.65477  3.01121  3.49737  1.77352  4.09840  3.06655  3.20939  2.44898  2.10883  3.17077  5.44867  4.02931    107 n - - -
          2.68618  4.42225  2.77519  2.73123  3.46354  2.40513  3.72494  3.29354  2.67741  2.69355  4.24690  2.90347  2.73739  3.18146  2.89801  2.37887  2.77519  2.98518  4.58477  3.61503
          0.01584  4.91592  4.78090  0.61958  0.77255  0.60176  0.79374
    104   2.18439  5.32585  3.06137  2.48482  4.66181  3.61543  3.70671  3.96456  2.10599  3.62692  4.31629  2.83776  3.73856  2.47132  2.21981  2.06788  2.74852  3.54006  5.76375  4.35914    108 s - - -
          2.68618  4.42225  2.77519  2.73123  3.46354  2.40513  3.72494  3.29354  2.67741  2.69355  4.24690  2.90347  2.73739  3.18146  2.89801  2.37887  2.77519  2.98518  4.58477  3.61503
          0.22424  4.90343  1.64271  0.61958  0.77255  0.59270  0.80482
    105   2.51514  4.13823  3.64416  3.11579  2.57965  3.79137  3.31714  2.67240  2.97894  1.90875  3.14248  3.27040  3.98014  3.21881  3.31388  2.97043  2.97174  2.52178  4.97195  2.75009    109 l - - -
          2.68618  4.42225  2.77519  2.73123  3.46354  2.40513  3.72494  3.29354  2.67741  2.69355  4.24690  2.90347  2.73739  3.18146  2.89801  2.37887  2.77519  2.98518  4.58477  3.61503
          0.02147  4.69891  4.41157  0.61958  0.77255  0.45204  1.01151
    106   3.10009  5.29333  3.10459  2.84850  4.76797  3.61798  3.96336  3.99780  2.95006  3.80744  4.63834  0.76182  4.25914  3.31068  3.39883  3.03672  2.85121  3.84082  5.99086  4.64061    110 n - - -
          2.68618  4.42225  2.77519  2.73123  3.46354  2.40513  3.72494  3.29354  2.67741  2.69355  4.24690  2.90347  2.73739  3.18146  2.89801  2.37887  2.77519  2.98518  4.58477  3.61503
          0.02145  4.87129  4.30086  0.61958  0.77255  0.66403  0.72314
    107   2.57762  4.11369  4.30002  3.56999  3.24514  3.94172  3.26011  2.59612  2.64966  2.05492  3.31916  3.86772  4.31129  3.71054  3.67537  3.22730  3.07185  2.09005  2.32663  2.68449    111 l - - -
          2.68618  4.42225  2.77519  2.73123  3.46354  2.40513  3.72494  3.29354  2.67741  2.69355  4.24690  2.90347  2.73739  3.18146  2.89801  2.37887  2.77519  2.98518  4.58477  3.61503
          0.16392  4.86588  1.94151  0.61958  0.77255  0.53518  0.88084
    108   2.66396  5.13852  2.27490  2.07091  4.49073  3.01796  3.17170  3.73535  2.39602  3.34454  3.96223  2.67008  3.95343  2.37032  2.75470  2.60209  2.84931  3.66826  5.19893  4.15187    112 e - - -
          2.68618  4.42225  2.77519  2.73123  3.46354  2.40513  3.72494  3.29354  2.67741  2.69355  4.24690  2.90347  2.73739  3.18146  2.89801  2.37887  2.77519  2.98518  4.58477  3.61503
          0.01979  4.76364  4.50434  0.61958  0.77255  0.37265  1.16767
    109   2.72624  5.00471  2.61264  1.14957  4.69634  3.50103  3.64324  4.09856  2.40106  3.62482  4.40700  3.09888  3.62597  2.89326  3.06928  2.77360  2.97221  3.74709  5.80003  4.39198    113 e - - -
          2.68618  4.42225  2.77519  2.73123  3.46354  2.40513  3.72494  3.29354  2.67741  2.69355  4.24690  2.90347  2.73739  3.18146  2.89801  2.37887  2.77519  2.98518  4.58477  3.61503
          0.01088  4.92190  5.64425  0.61958  0.77255  0.56990  0.83375
    110   2.76301  4.92208  1.32258  2.56840  4.49437  3.53531  3.56844  3.96541  2.54256  3.47193  4.26440  2.54242  3.69551  2.83170  3.02464  2.69562  3.04118  3.50232  5.73487  4.15997    114 d - - -
          2.68618  4.42225  2.77519  2.73123  3.46354  2.40513  3.72494  3.29354  2.67741  2.69355  4.24690  2.90347  2.73739  3.18146  2.89801  2.37887  2.77519  2.98518  4.58477  3.61503
          0.01088  4.92190  5.64425  0.61958  0.77255  0.56990  0.83375
    111   2.87928  4.26607  4.76124  3.72541  2.73476  4.04027  4.36876  2.37213  3.95437  1.85613  1.42292  4.17542  4.25772  4.09969  3.99103  3.29935  2.98244  2.39173  4.15278  3.41511    115 m - - -
          2.68618  4.42225  2.77519  2.73123  3.46354  2.40513  3.72494  3.29354  2.67741  2.69355  4.24690  2.90347  2.73739  3.18146  2.89801  2.37887  2.77519  2.98518  4.58477  3.61503
          0.01088  4.92190  5.64425  0.61958  0.77255  0.56990  0.83375
    112   2.39287  4.39647  3.52505  2.96225  3.25351  3.48290  3.67386  2.82215  2.74308  2.78477  3.54703  2.75061  4.15930  3.21370  3.02551  2.00022  2.21865  2.64771  5.28980  4.02538    116 s - - -
          2.68618  4.42225  2.77519  2.73123  3.46354  2.40513  3.72494  3.29354  2.67741  2.69355  4.24690  2.90347  2.73739  3.18146  2.89801  2.37887  2.77519  2.98518  4.58477  3.61503
          0.01088  4.92190  5.64425  0.61958  0.77255  0.56990  0.83375
    113   2.37589  5.34946  2.33928  1.83559  4.54546  3.32123  3.60199  4.07668  2.32457  3.65383  4.29783  2.73492  3.07441  2.76447  2.82206  2.53490  2.93127  3.73895  4.29742  4.23088    117 e - - -
          2.68618  4.42225  2.77519  2.73123  3.46354  2.40513  3.72494  3.29354  2.67741  2.69355  4.24690  2.90347  2.73739  3.18146  2.89801  2.37887  2.77519  2.98518  4.58477  3.61503
          0.01454  4.92190  4.94018  0.61958  0.77255  0.56990  0.83375
    114   2.55137  4.68769  3.47745  2.78686  2.11523  3.58159  3.22975  3.12648  2.87326  2.01423  3.34785  3.25292  3.52685  2.82097  3.27688  2.91347  2.89480  2.82140  5.25367  3.74472    118 l - - -
          2.68618  4.42225  2.77519  2.73123  3.46354  2.40513  3.72494  3.29354  2.67741  2.69355  4.24690  2.90347  2.73739  3.18146  2.89801  2.37887  2.77519  2.98518  4.58477  3.61503
          0.01092  4.91828  5.64063  0.61958  0.77255  0.56332  0.84238
    115   2.83767  4.07261  4.98944  4.40066  3.58920  4.31456  4.68547  1.16846  3.67347  1.94457  3.26467  4.44720  4.65946  4.38625  4.28021  3.58021  3.31991  1.59761  5.19097  4.00800    119 i - - -
          2.68618  4.42225  2.77519  2.73123  3.46354  2.40513  3.72494  3.29354  2.67741  2.69355  4.24690  2.90347  2.73739  3.18146  2.89801  2.37887  2.77519  2.98518  4.58477  3.61503
          0.01105  4.90660  5.62894  0.61958  0.77255  0.56990  0.83375
    116   2.40521  5.32270  2.84642  2.04083  4.65697  3.35204  3.73334  3.60193  2.25133  2.78006  3.88573  2.65454  4.00907  2.53928  2.64537  2.49662  2.71769  3.54202  5.76190  4.23309    120 e - - -
          2.68618  4.42225  2.77519  2.73123  3.46354  2.40513  3.72494  3.29354  2.67741  2.69355  4.24690  2.90347  2.73739  3.18146  2.89801  2.37887  2.77519  2.98518  4.58477  3.61503
          0.01390  4.90660  5.05123  0.61958  0.77255  0.56990  0.83375
    117   2.42162  4.84460  2.80100  1.92226  4.53450  3.44990  3.63704  3.89108  2.16070  3.40654  4.24316  2.99858  3.95805  2.47358  2.45319  2.31152  2.87679  3.45931  5.77111  4.19458    121 e - - -
          2.68618  4.42225  2.77519  2.73123  3.46354  2.40513  3.72494  3.29354  2.67741  2.69355  4.24690  2.90347  2.73739  3.18146  2.89801  2.37887  2.77519  2.98518  4.58477  3.61503
          0.01108  4.90378  5.62613  0.61958  0.77255  0.57651  0.82520
    118   2.44621  3.95076  4.69884  4.09189  3.19582  3.63603  4.24626  2.22612  3.90380  1.19791  3.07374  3.84229  4.38074  4.05854  3.95630  3.23321  2.96362  2.25822  4.87546  3.29862    122 l - - -
          2.68618  4.42225  2.77519  2.73123  3.46354  2.40513  3.72494  3.29354  2.67741  2.69355  4.24690  2.90347  2.73739  3.18146  2.89801  2.37887  2.77519  2.98518  4.58477  3.61503
          0.02279  4.90378  4.19221  0.61958  0.77255  0.57651  0.82520
    119   2.54378  5.34146  2.64703  2.42018  4.68566  2.65518  3.54696  4.17091  2.21981  3.54039  4.05021  2.24704  4.00035  2.46371  2.29357  2.53895  3.01018  3.73164  5.77455  4.36425    123 k - - -
          2.68618  4.42225  2.77519  2.73123  3.46354  2.40513  3.72494  3.29354  2.67741  2.69355  4.24690  2.90347  2.73739  3.18146  2.89801  2.37887  2.77519  2.98518  4.58477  3.61503
          0.01121  4.89221  5.61455  0.61958  0.77255  0.55628  0.85177
    120   2.48663  4.66391  3.75435  3.21215  3.94755  3.79634  4.24283  3.00309  3.22523  2.89062  3.83734  3.65679  1.03607  3.54883  3.57569  3.04333  3.17032  2.60728  5.39001  4.15274    124 p - - -
          2.68618  4.42225  2.77519  2.73123  3.46354  2.40513  3.72494  3.29354  2.67741  2.69355  4.24690  2.90347  2.73739  3.18146  2.89801  2.37887  2.77519  2.98518  4.58477  3.61503
          0.03347  4.90378  3.66929  0.61958  0.77255  0.57651  0.82520
    121   2.68319  3.87799  2.53613  2.37525  3.14500  3.62598  3.68391  2.75268  2.52299  2.96056  3.20559  2.94124  3.83829  2.86531  3.14914  2.70604  2.79348  2.59355  5.42616  3.63679    125 e - - -
          2.68618  4.42225  2.77519  2.73123  3.46354  2.40513  3.72494  3.29354  2.67741  2.69355  4.24690  2.90347  2.73739  3.18146  2.89801  2.37887  2.77519  2.98518  4.58477  3.61503
          0.01133  4.88165  5.60399  0.61958  0.77255  0.48565  0.95529
    122   2.99353  5.70636  3.80961  2.77832  5.19327  4.08398  3.65994  4.54726  1.78003  3.93705  4.76316  3.56190  4.43422  2.75424  0.87801  3.39655  3.59773  4.18301  5.95496  4.75286    126 r - - -
          2.68618  4.42225  2.77519  2.73123  3.46354  2.40513  3.72494  3.29354  2.67741  2.69355  4.24690  2.90347  2.73739  3.18146  2.89801  2.37887  2.77519  2.98518  4.58477  3.61503
          0.02866  4.91811  3.86585  0.61958  0.77255  0.54218  0.87102
    123   3.22513  4.66246  4.62717  4.07353  2.90362  4.27252  3.84861  2.61828  3.87127  2.67406  3.75270  4.18801  4.62576  4.09565  3.55330  3.57352  3.45324  2.86443  0.88618  3.02514    127 w - - -
          2.68618  4.42225  2.77519  2.73123  3.46354  2.40513  3.72494  3.29354  2.67741  2.69355  4.24690  2.90347  2.73739  3.18146  2.89801  2.37887  2.77519  2.98518  4.58477  3.61503
          0.06751  4.90056  2.85017  0.61958  0.77255  0.58401  0.81567
    124   3.20879  5.33569  3.67136  3.14681  4.98401  3.86698  4.12709  4.33752  0.66652  3.85721  4.70011  3.55861  4.35074  3.26919  2.78998  2.97702  2.81243  3.79661  5.95615  4.73376    128 K - - -
          2.68618  4.42225  2.77519  2.73123  3.46354  2.40513  3.72494  3.29354  2.67741  2.69355  4.24690  2.90347  2.73739  3.18146  2.89801  2.37887  2.77519  2.98518  4.58477  3.61503
          0.02360  4.82775  4.17889  0.61958  0.77255  0.70221  0.68417
    125   2.64923  3.65346  4.40773  3.72046  3.37070  3.94656  4.25848  1.96814  3.30610  2.26440  3.13182  3.97390  4.31397  2.90276  3.71885  3.20997  3.05572  1.40964  4.88740  3.70024    129 v - - -
          2.68618  4.42225  2.77519  2.73123  3.46354  2.40513  3.72494  3.29354  2.67741  2.69355  4.24690  2.90347  2.73739  3.18146  2.89801  2.37887  2.77519  2.98518  4.58477  3.61503
          0.11665  4.81050  2.28321  0.61958  0.77255  0.72382  0.66339
    126   3.05400  4.45030  4.70299  3.59957  1.13979  4.18060  4.32133  2.73858  3.95965  1.74064  3.28132  4.21353  4.51723  4.10867  4.04959  3.48813  3.28250  2.52454  4.00823  3.39169    130 f - - -
          2.68618  4.42225  2.77519  2.73123  3.46354  2.40513  3.72494  3.29354  2.67741  2.69355  4.24690  2.90347  2.73739  3.18146  2.89801  2.37887  2.77519  2.98518  4.58477  3.61503
          0.01350  4.70736  5.42970  0.61958  0.77255  0.88950  0.52909
    127   3.17334  5.49416  3.50464  2.62737  4.92864  3.86058  3.86557  4.31678  1.93054  3.40523  4.54943  3.33924  4.22501  1.23392  1.91109  3.14104  3.35900  3.94087  5.79538  4.54387    131 q - - -
          2.68618  4.42225  2.77519  2.73123  3.46354  2.40513  3.72494  3.29354  2.67741  2.69355  4.24690  2.90347  2.73739  3.18146  2.89801  2.37887  2.77519  2.98518  4.58477  3.61503
          0.00911  4.70296        *  0.61958  0.77255  0.00000        *
//
